# Supplementary material for: Interaction between biimidazole complexes of ruthenium and acetate: hydrogen bonding and proton transfer
Source: Royal Society of Chemistry journal article supplement (doi:10.1039/c2dt30225j), 2012-01-01
Supplement: c2dt30225j.pdf [file c2dt30225j.pdf]

## Supplementary Information

for

# Interaction Between Biimidazole Complexes of Ruthenium and Acetate: Hydrogen Bonding and Proton Transfer

Hao-Jun Mo, Jin-Ji Wu, Zheng-Ping Qiao and Bao-Hui Ye\*

MOE Key Laboratory of Bioinorganic and Synthetic Chemistry, School of Chemistry and Chemical  
Engineering, Sun Yat-Sen University, Guangzhou 510275, China

EMAIL: [cesybh@mail.sysu.edu.cn](mailto:cesybh@mail.sysu.edu.cn)

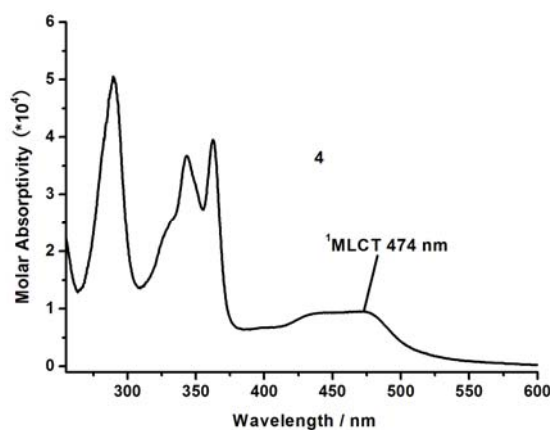

Fig. S1 Absorption spectra of **4** in acetonitrile at 298 K

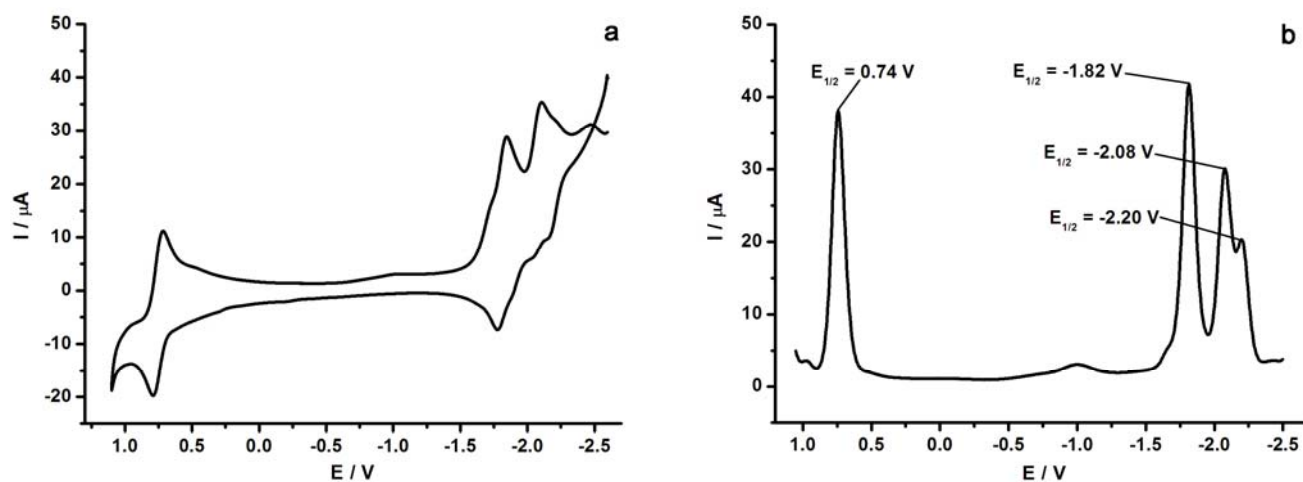

Fig. S2 (a) Cyclic voltammetric and (b) square wave voltammetric curves of **4** with a scan rate of  $100 \text{ mV}\cdot\text{s}^{-1}$  in acetonitrile at 298 K (vs.  $\text{Ag}/\text{AgNO}_3$ ).

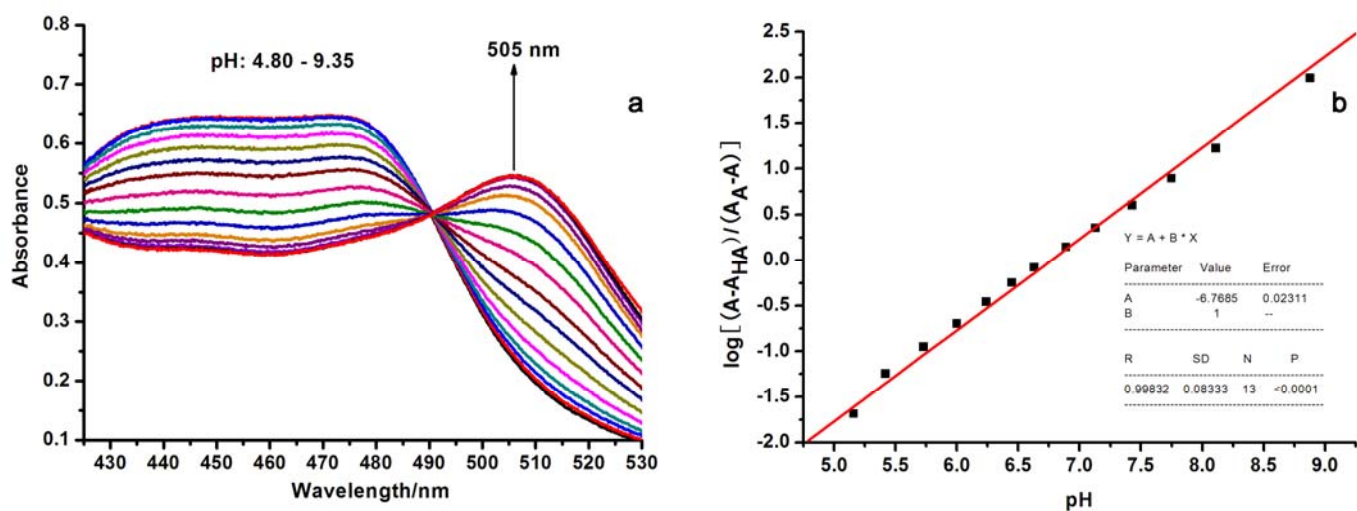

**Fig. S3** Determination of  $pK_{a1}$  of **4** in acetonitrile-water mixture by UV method. (a) Absorption spectral change as pH value increases. (b) Linear fitting of  $pK_{a1}$ .

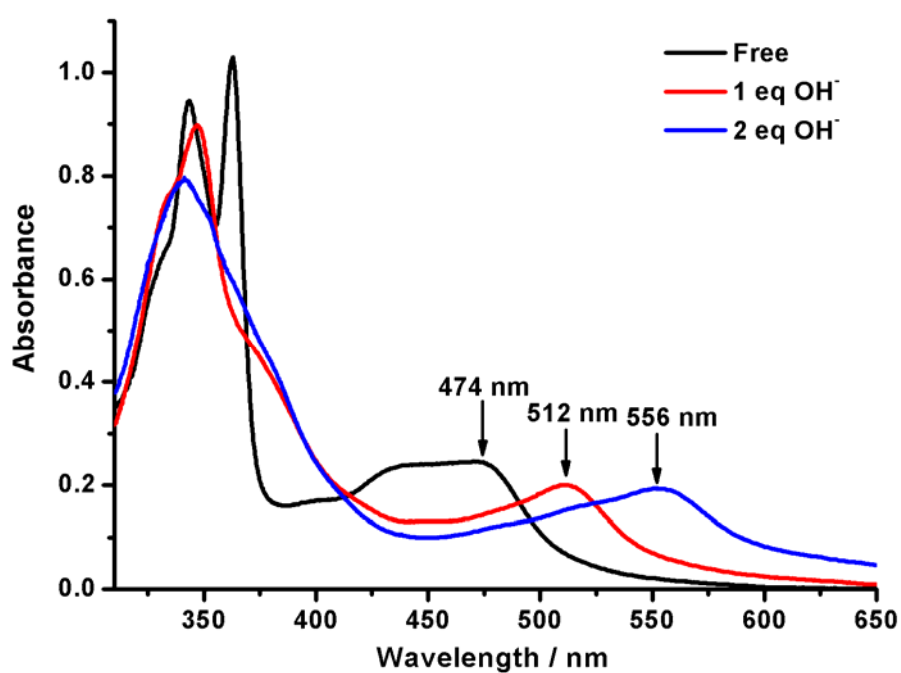

**Fig. S4** Absorption spectra of **4** ( $2 \times 10^{-5} \text{ mol} \cdot \text{dm}^{-3}$ ) in acetonitrile in the absence and presence of 1 equiv and 2 equiv of  $\text{OH}^-$ .

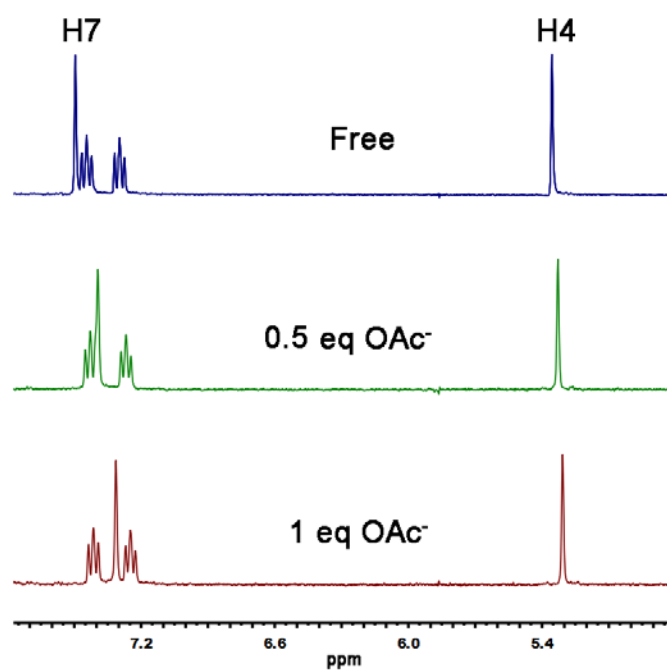

**Fig. S5**  $^1\text{H}$  NMR titration of **4** ( $0.003 \text{ mol}\cdot\text{dm}^{-3}$ ) in acetonitrile- $d_3$  with  $\text{OAc}^-$  (298 K, 300 MHz).

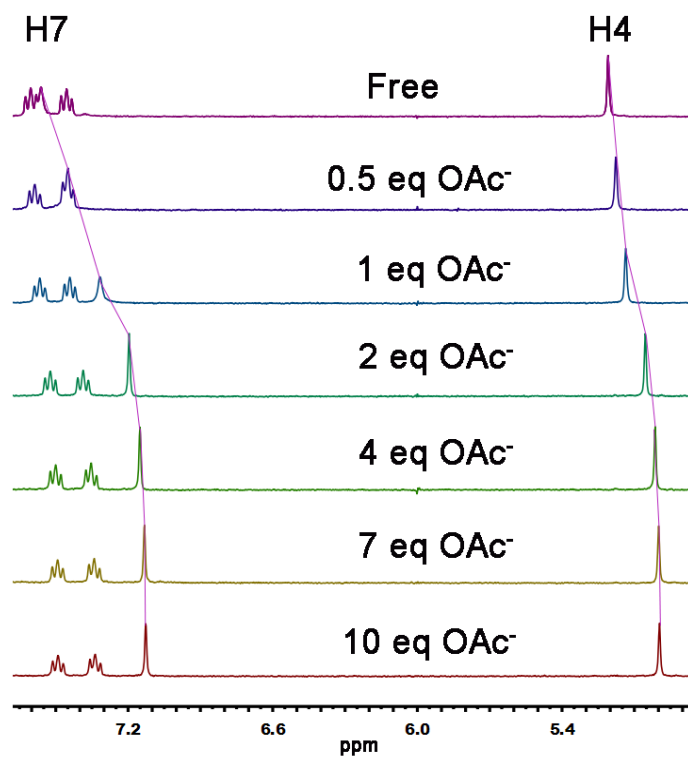

**Fig. S6**  $^1\text{H}$  NMR titration of **4** ( $0.003 \text{ mol}\cdot\text{dm}^{-3}$ ) in  $\text{DMSO}-d_6$  with  $\text{OAc}^-$  (298 K, 300 MHz).

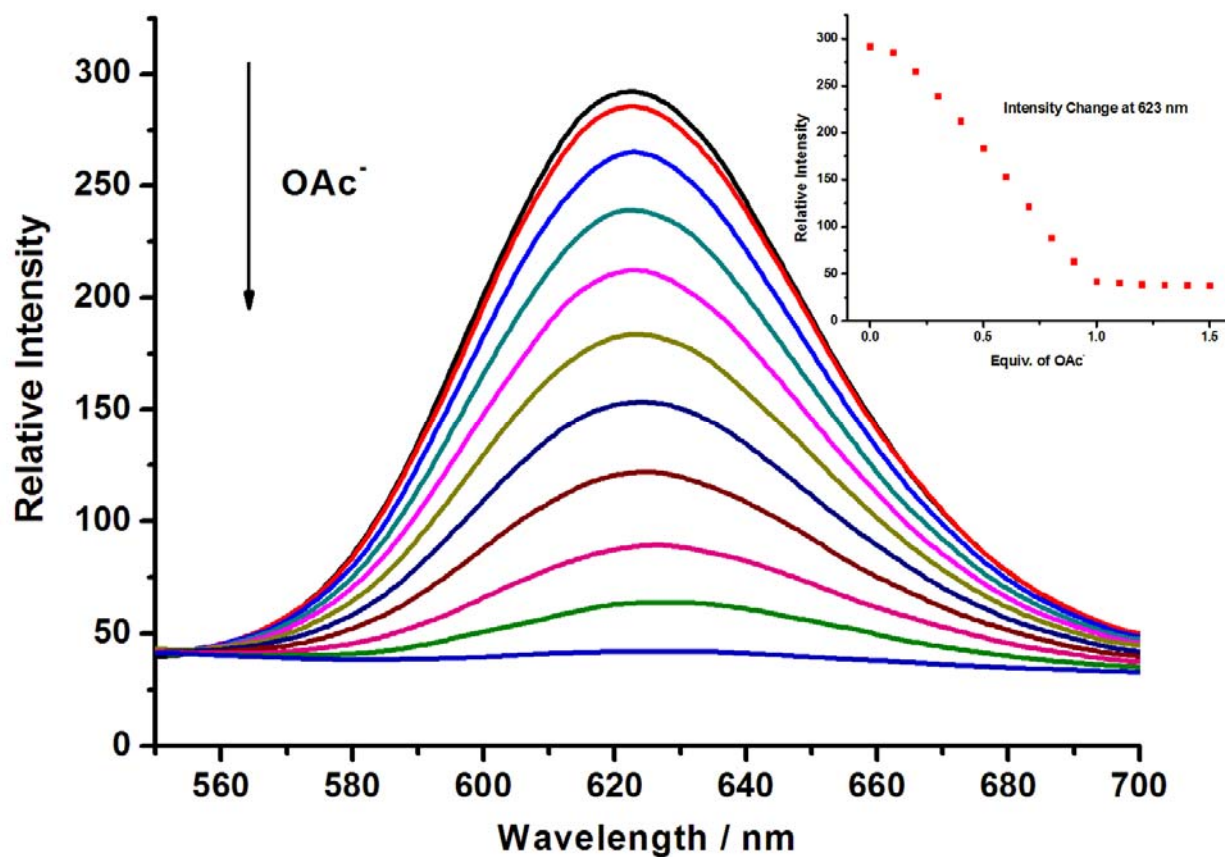

**Fig. S7** Emission spectral response of **4** ( $2.0 \times 10^{-5}$  mol·dm<sup>-3</sup> in acetonitrile, 298K,  $\lambda_{\text{ex}} = 470$  nm) upon addition of OAc<sup>-</sup> anion. Inset: Intensity at 623 nm versus equiv of OAc<sup>-</sup>.

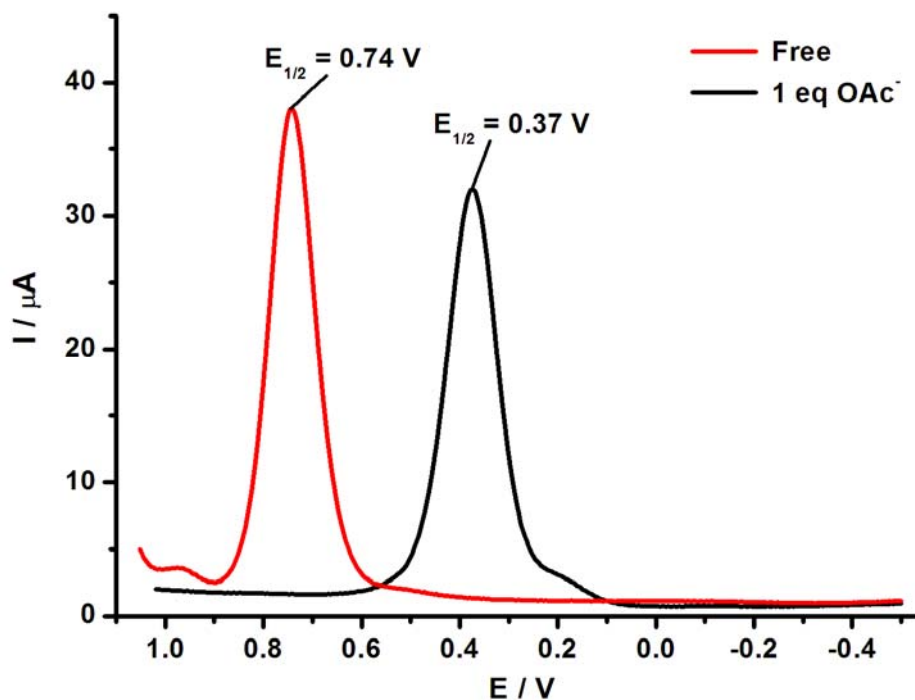

**Fig. S8** SWV measurements of **4** in acetonitrile ( $0.001$  mol·dm<sup>-3</sup>) in the absence and presence of 1 equiv of OAc<sup>-</sup> (vs. Ag/AgNO<sub>3</sub>).

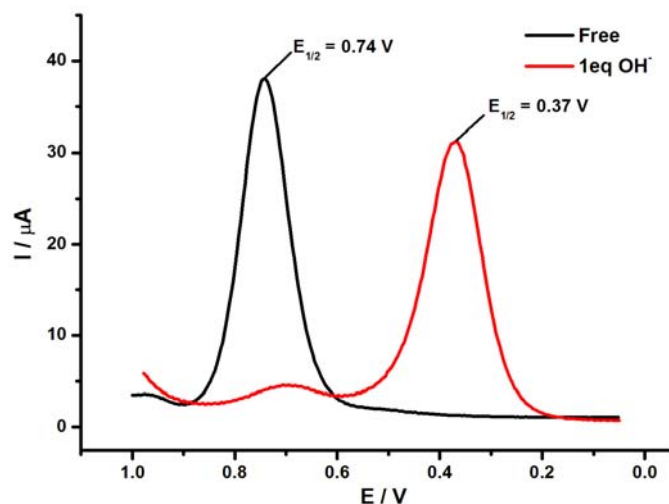

**Fig. S9** SWV measurements of **4** in acetonitrile ( $0.001 \text{ mol}\cdot\text{dm}^{-3}$ ) in the absence and presence of 1 equiv of  $\text{OH}^-$  (vs.  $\text{Ag}/\text{AgNO}_3$ ).

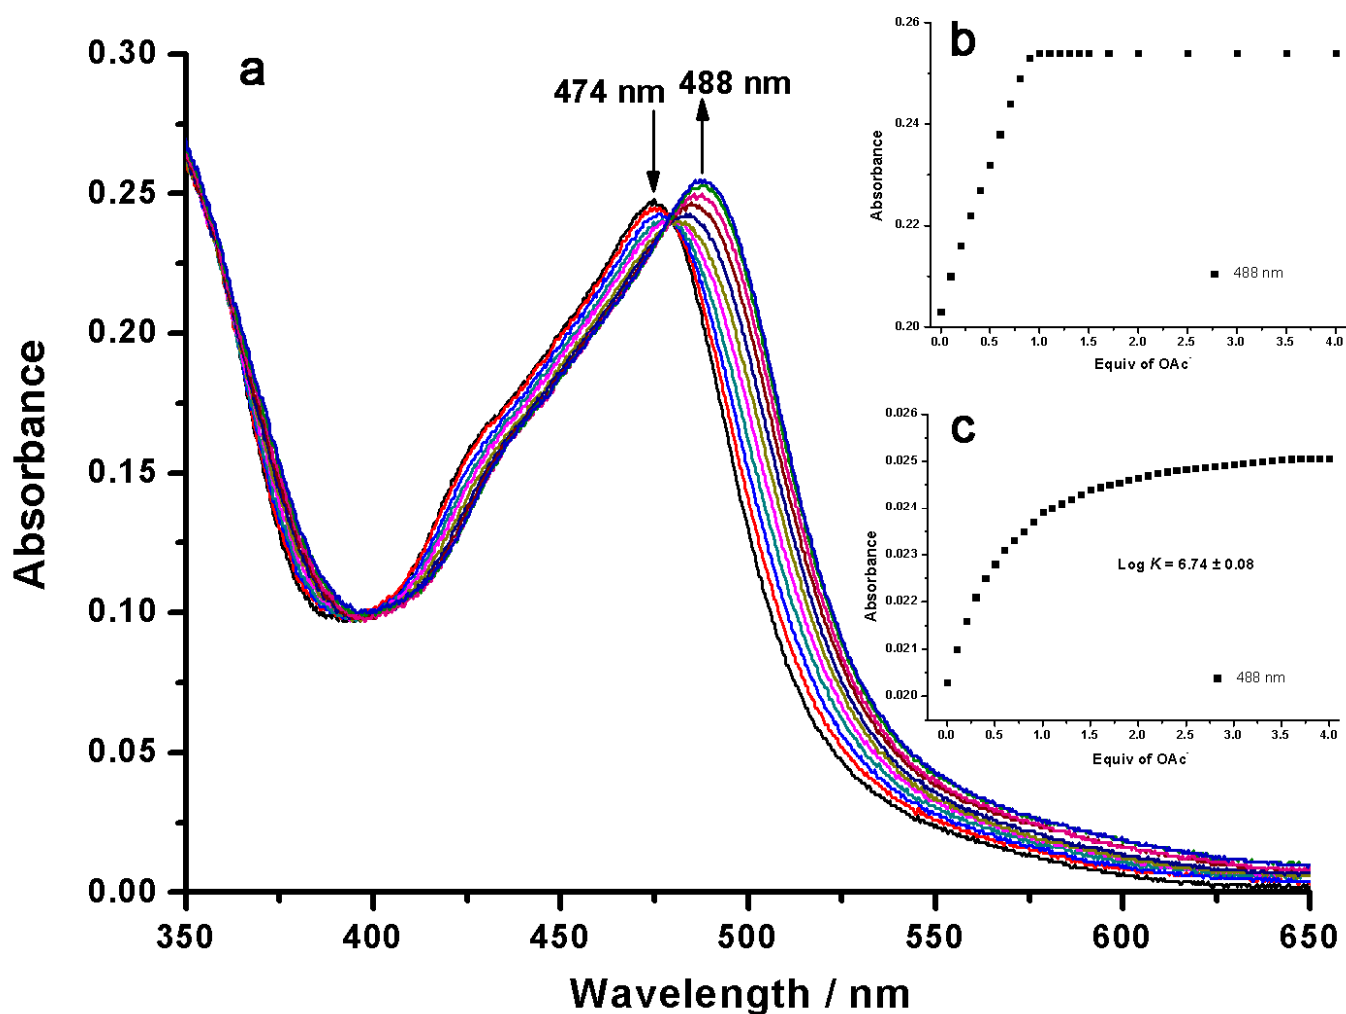

**Fig. S10** (a) UV-vis titration of **1** ( $2.0 \times 10^{-5} \text{ mol}\cdot\text{dm}^{-3}$ ) in acetonitrile in the presence of  $0.0016 \text{ mol}\cdot\text{dm}^{-3}$  HOAc upon addition of  $\text{OAc}^-$ . Absorbance change at 488 nm for a  $2.0 \times 10^{-5} \text{ mol}\cdot\text{dm}^{-3}$  solution (b) and for a  $2.0 \times 10^{-6} \text{ mol}\cdot\text{dm}^{-3}$  solution (c) of **1**.

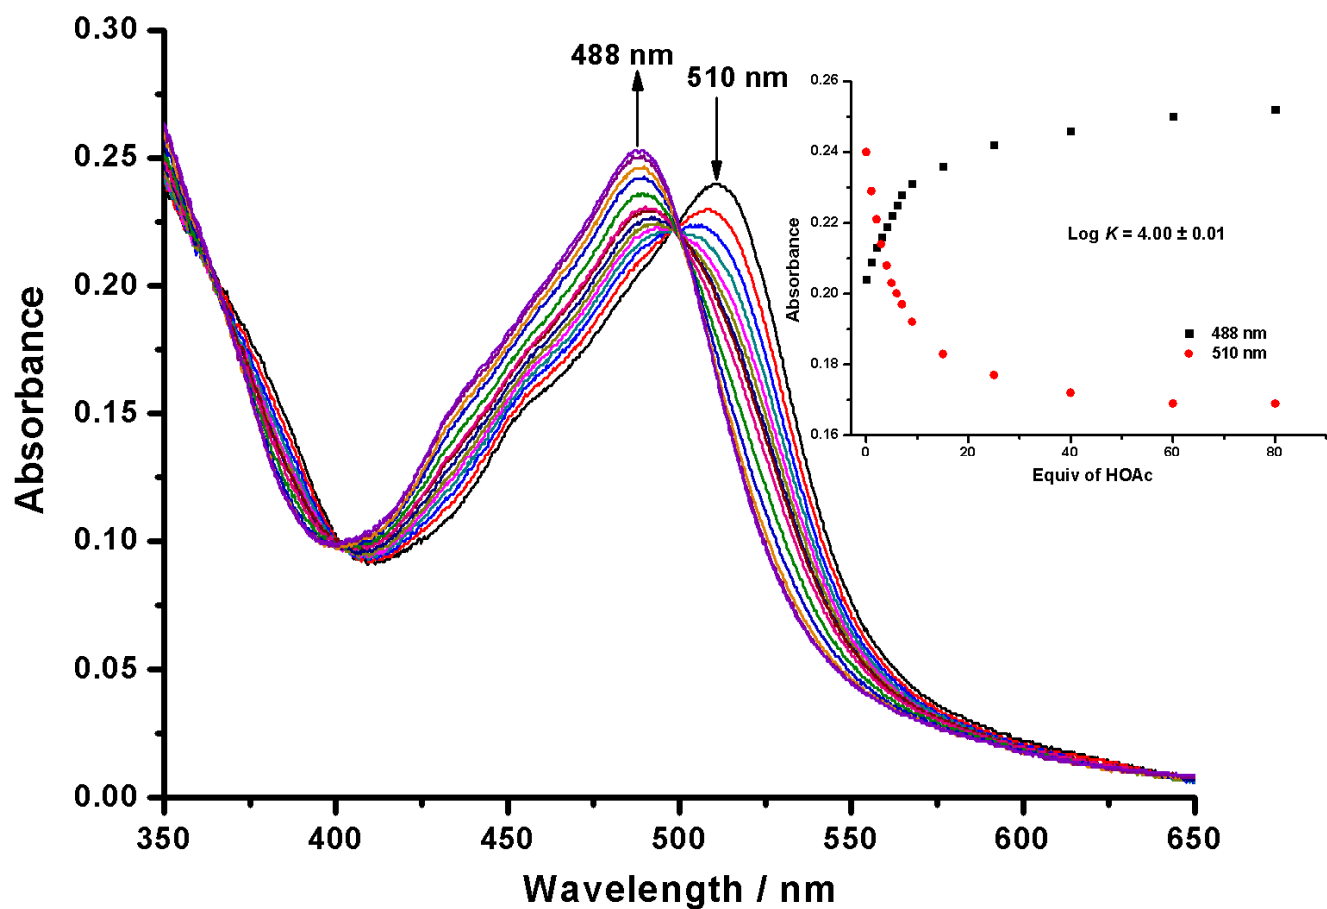

**Fig. S11** UV-vis titration of mono-deprotonated **1** ( $2.0 \times 10^{-5} \text{ mol} \cdot \text{dm}^{-3}$ ) in acetonitrile upon addition of HOAc. Inset: Absorbance at 488 and 510 nm vs. equiv of HOAc.

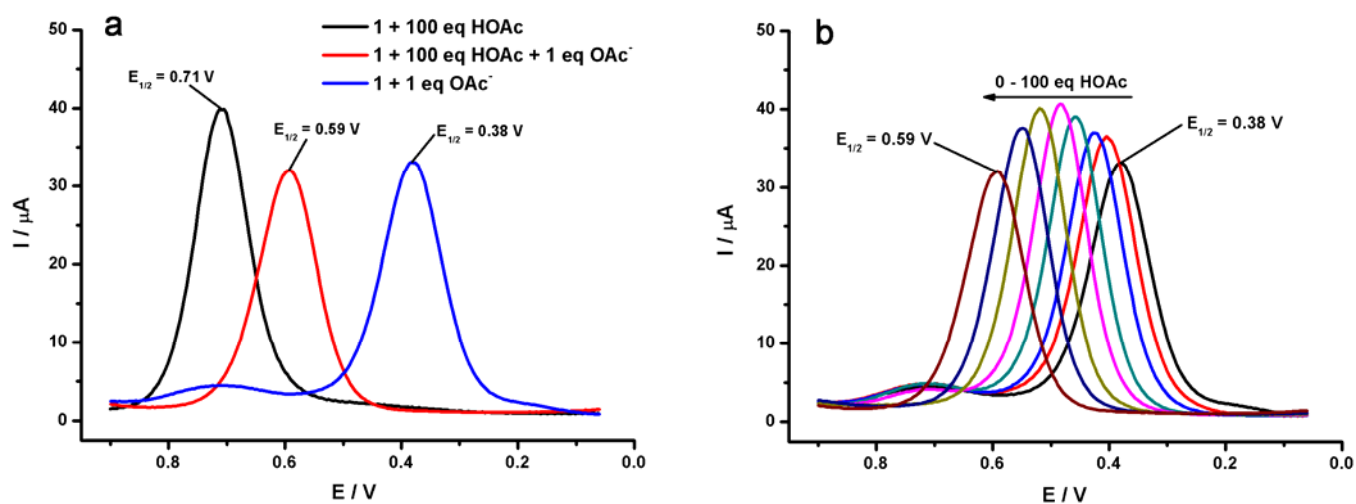

**Fig. S12** (a) SWV curves of **1** ( $0.001 \text{ mol} \cdot \text{dm}^{-3}$ ) and 100 equiv. of HOAc in acetonitrile in the absence and presence of 1 equiv. of  $\text{OAc}^-$ , and **1** in the presence of 1 equiv. of  $\text{OAc}^-$ . (b) Evolution of SWV curves of **1** ( $0.001 \text{ mol} \cdot \text{dm}^{-3}$ ) and 1 equiv. of  $\text{OAc}^-$  in acetonitrile in the presence of increasing amount of HOAc from 0 to 100 equiv.

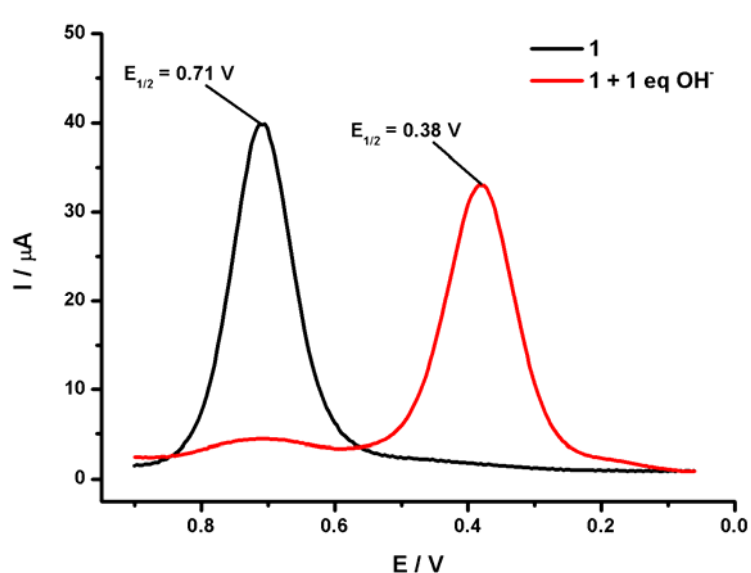

**Fig. S13** SWV measurements of **1** in acetonitrile ( $0.001 \text{ mol}\cdot\text{dm}^{-3}$ ) in the absence and presence of 1 equiv of  $\text{OH}^-$  (vs.  $\text{Ag}/\text{AgNO}_3$ ).

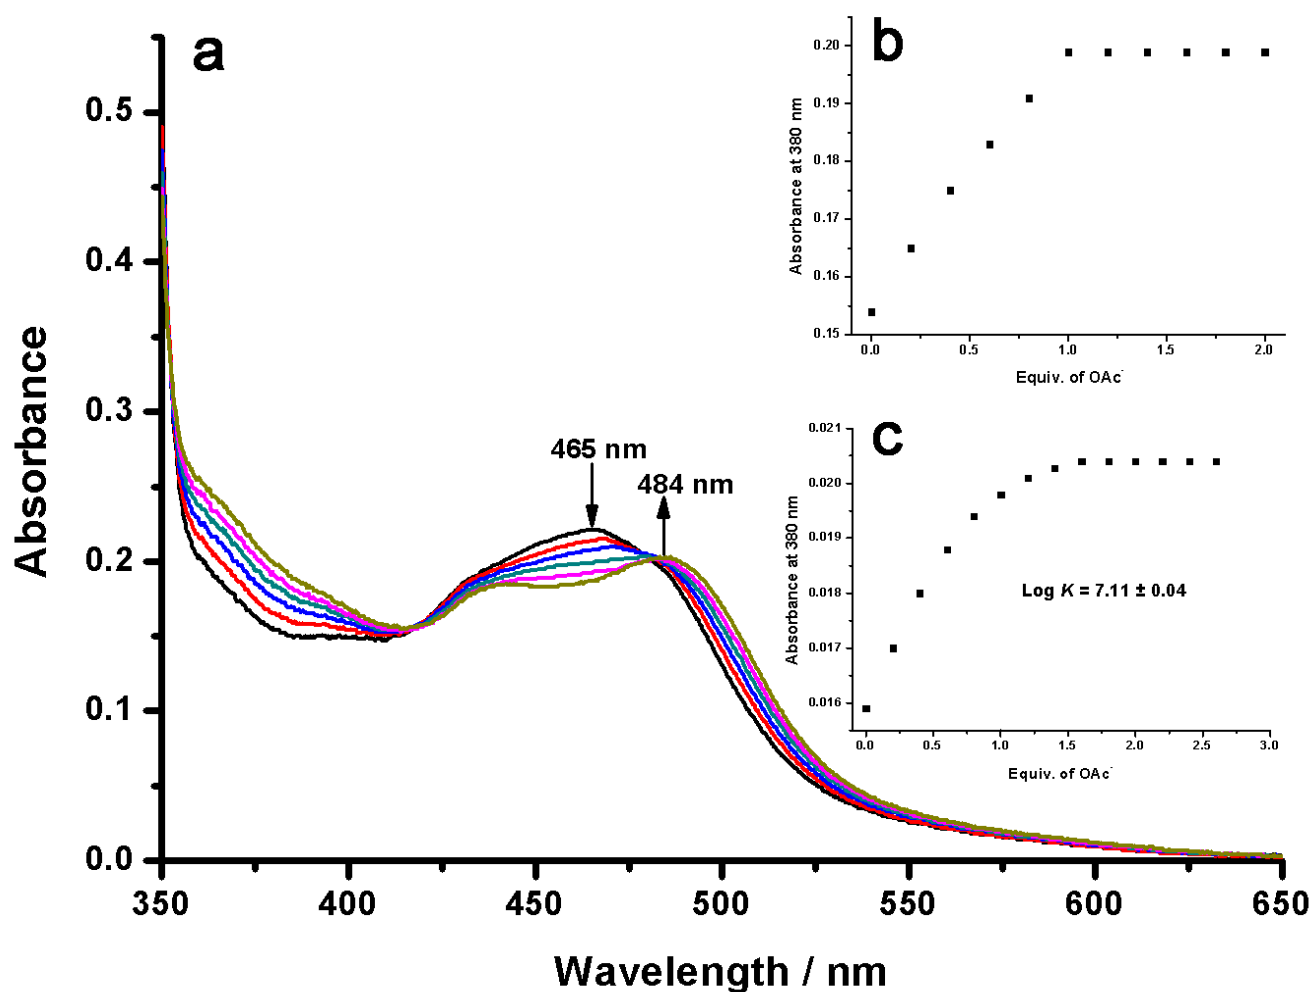

**Fig. S14** (a) UV-vis titration of **2** ( $2.0 \times 10^{-5} \text{ mol}\cdot\text{dm}^{-3}$ ) in acetonitrile in the presence of  $0.048 \text{ mol}\cdot\text{dm}^{-3}$  HOAc upon addition of  $\text{OAc}^-$ . Absorbance change at 380 nm for a  $2.0 \times 10^{-5} \text{ mol}\cdot\text{dm}^{-3}$  solution (b) and for a  $2.0 \times 10^{-6} \text{ mol}\cdot\text{dm}^{-3}$  solution (c) of **2**.

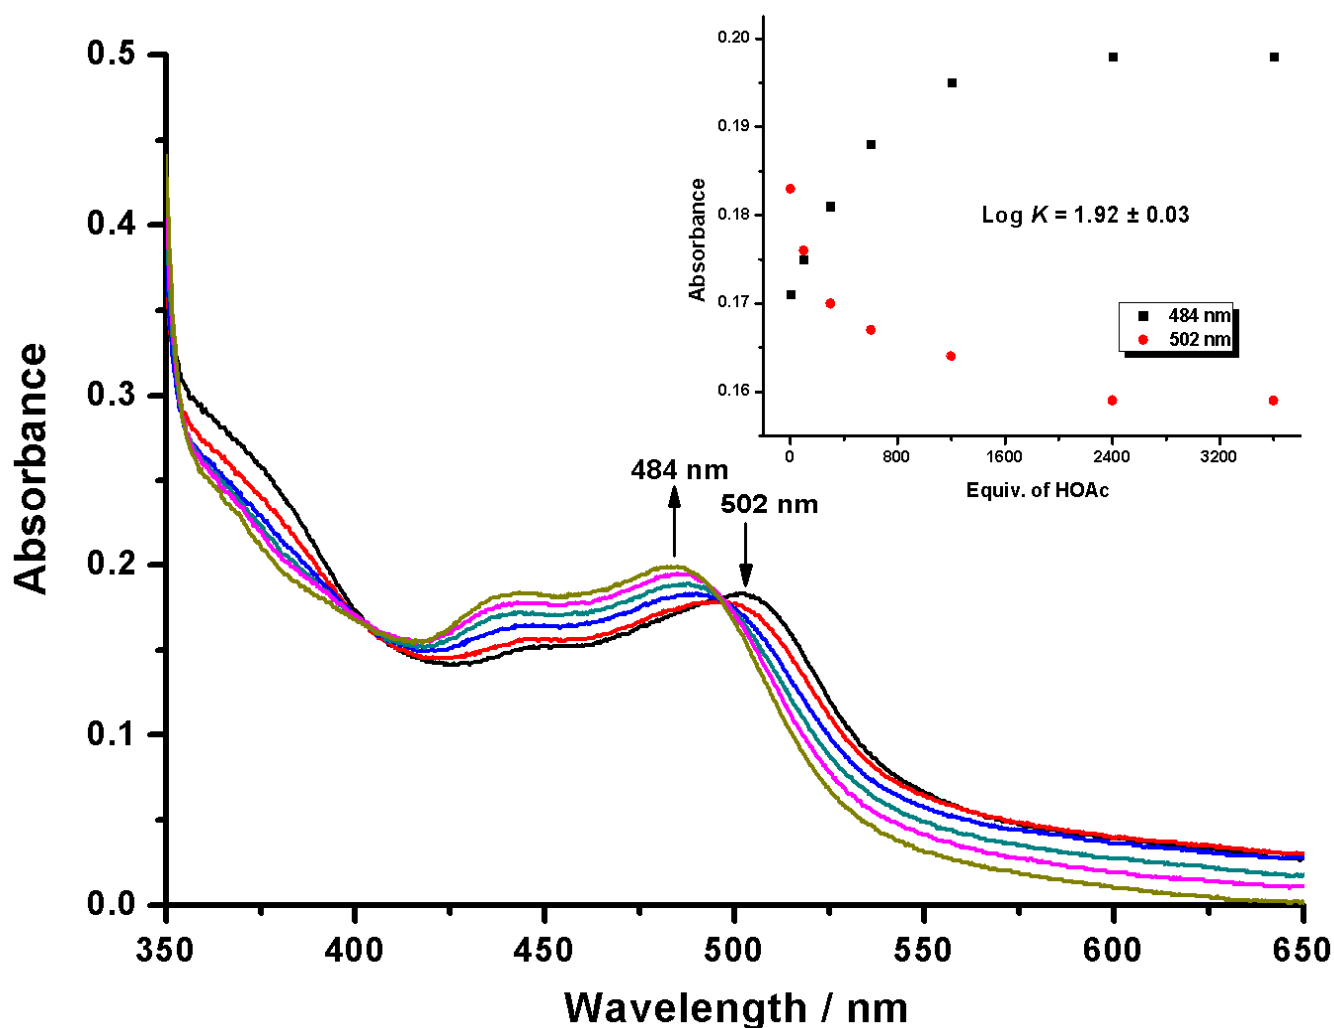

**Fig. S15** UV-vis titration of mono-deprotonated **2** ( $2.0 \times 10^{-5}$  mol·dm<sup>-3</sup>) in acetonitrile upon addition of HOAc. Inset: Absorbance at 484 and 502 nm vs. equiv of HOAc.

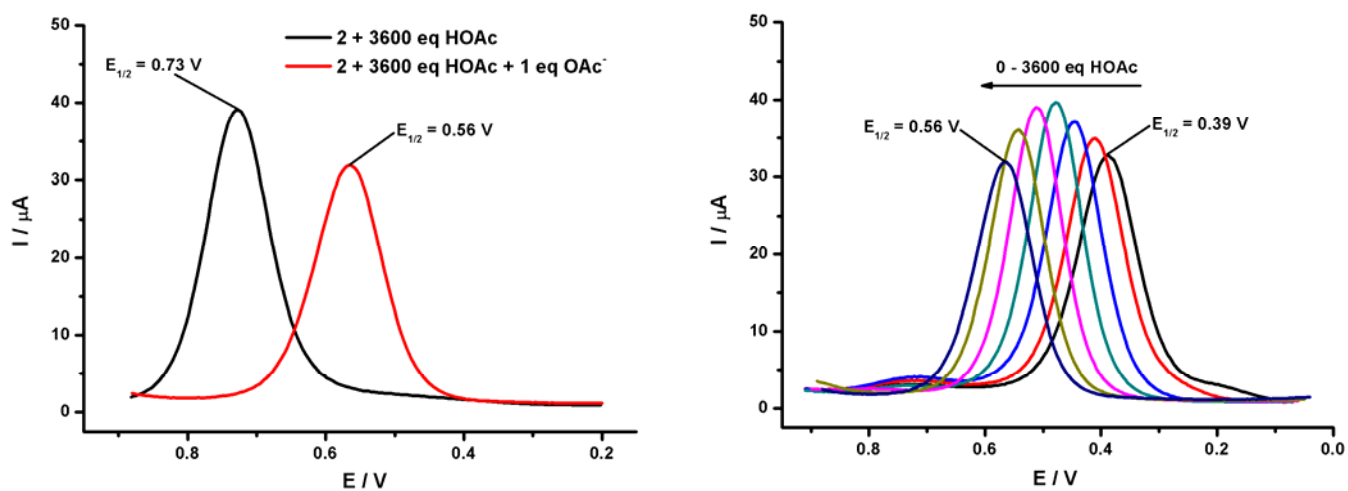

**Fig. S16** (a) SWV curves of **2** ( $0.001$  mol·dm<sup>-3</sup>) and 3600 equiv. of HOAc in acetonitrile in the absence and presence of 1 equiv. of OAc<sup>-</sup>. (b) Evolution of SWV curves of **2** ( $0.001$  mol·dm<sup>-3</sup>) and 1 equiv. of OAc<sup>-</sup> in acetonitrile in the presence of increasing amount of HOAc from 0 to 3600 equiv.



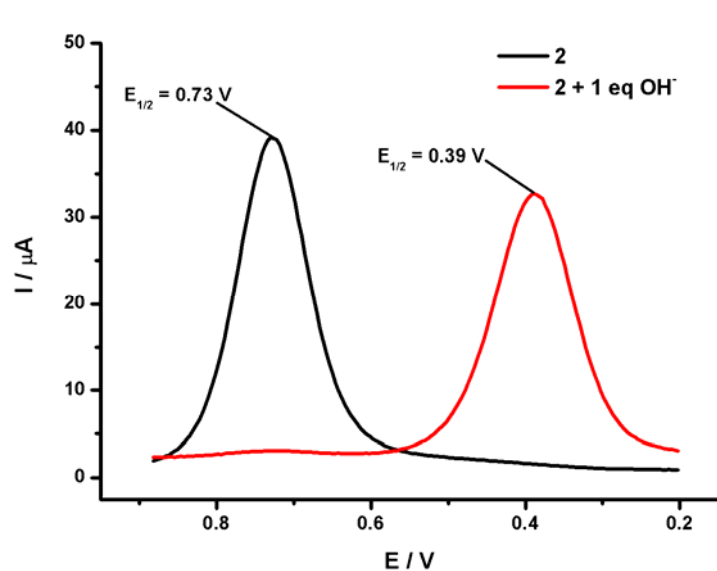

**Fig. S17** SWV measurements of **2** in acetonitrile ( $0.001 \text{ mol}\cdot\text{dm}^{-3}$ ) in the absence and presence of 1 equiv of  $\text{OH}^-$  (vs.  $\text{Ag}/\text{AgNO}_3$ ).

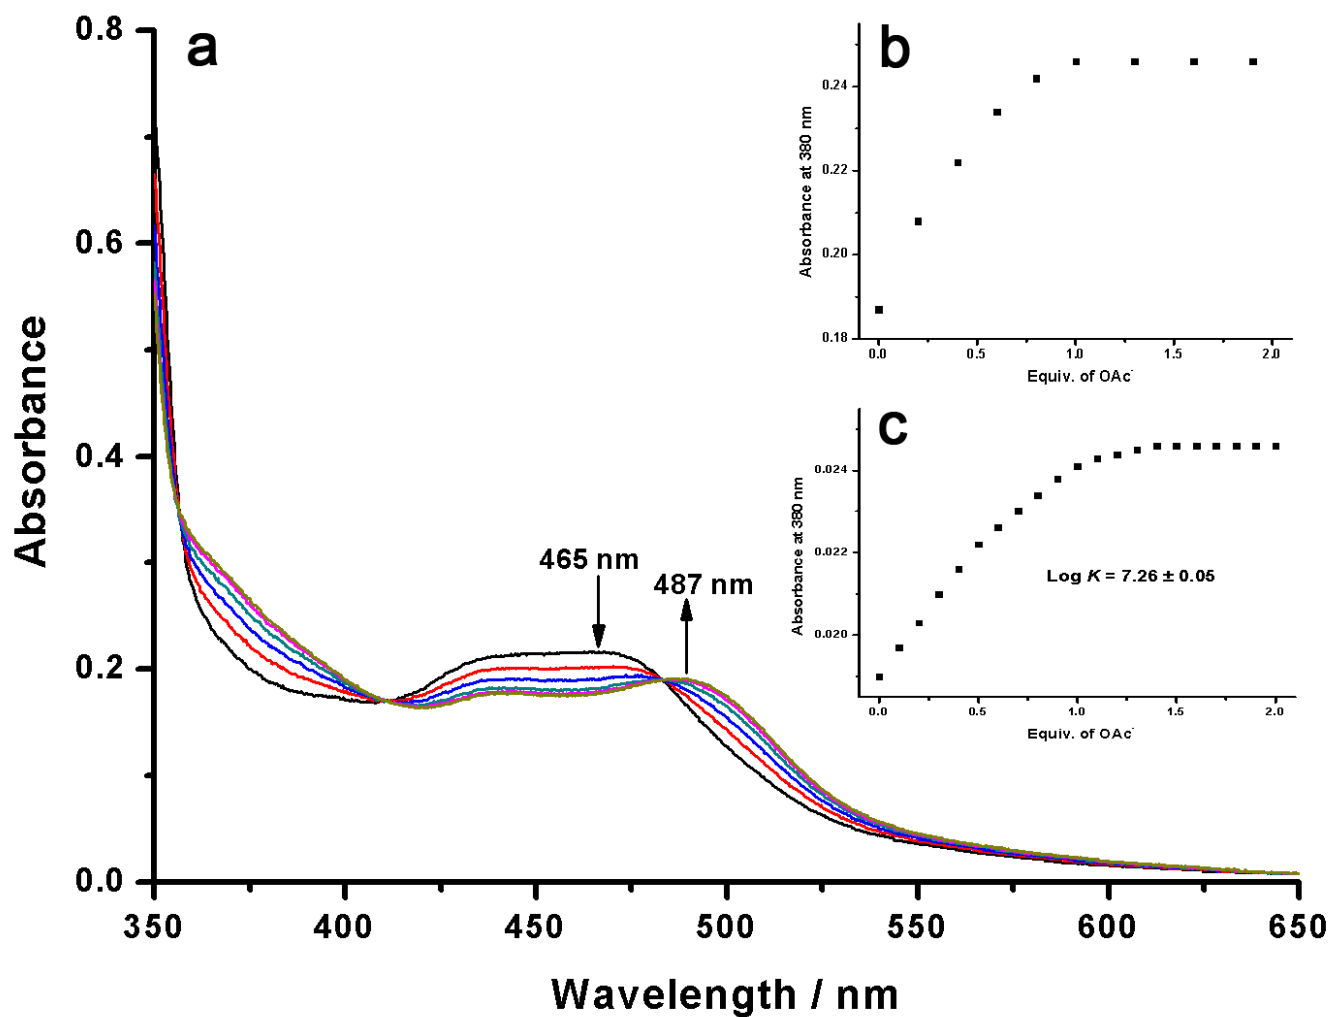

**Fig. S18** (a) UV-vis titration of **3** ( $2.0 \times 10^{-5} \text{ mol}\cdot\text{dm}^{-3}$ ) in acetonitrile in the presence of  $0.009 \text{ mol}\cdot\text{dm}^{-3}$  HOAc upon addition of  $\text{OAc}^-$ . Absorbance change at 380 nm for a  $2.0 \times 10^{-5} \text{ mol}\cdot\text{dm}^{-3}$  solution (b) and for a  $2.0 \times 10^{-6} \text{ mol}\cdot\text{dm}^{-3}$  solution (c) of **3**.

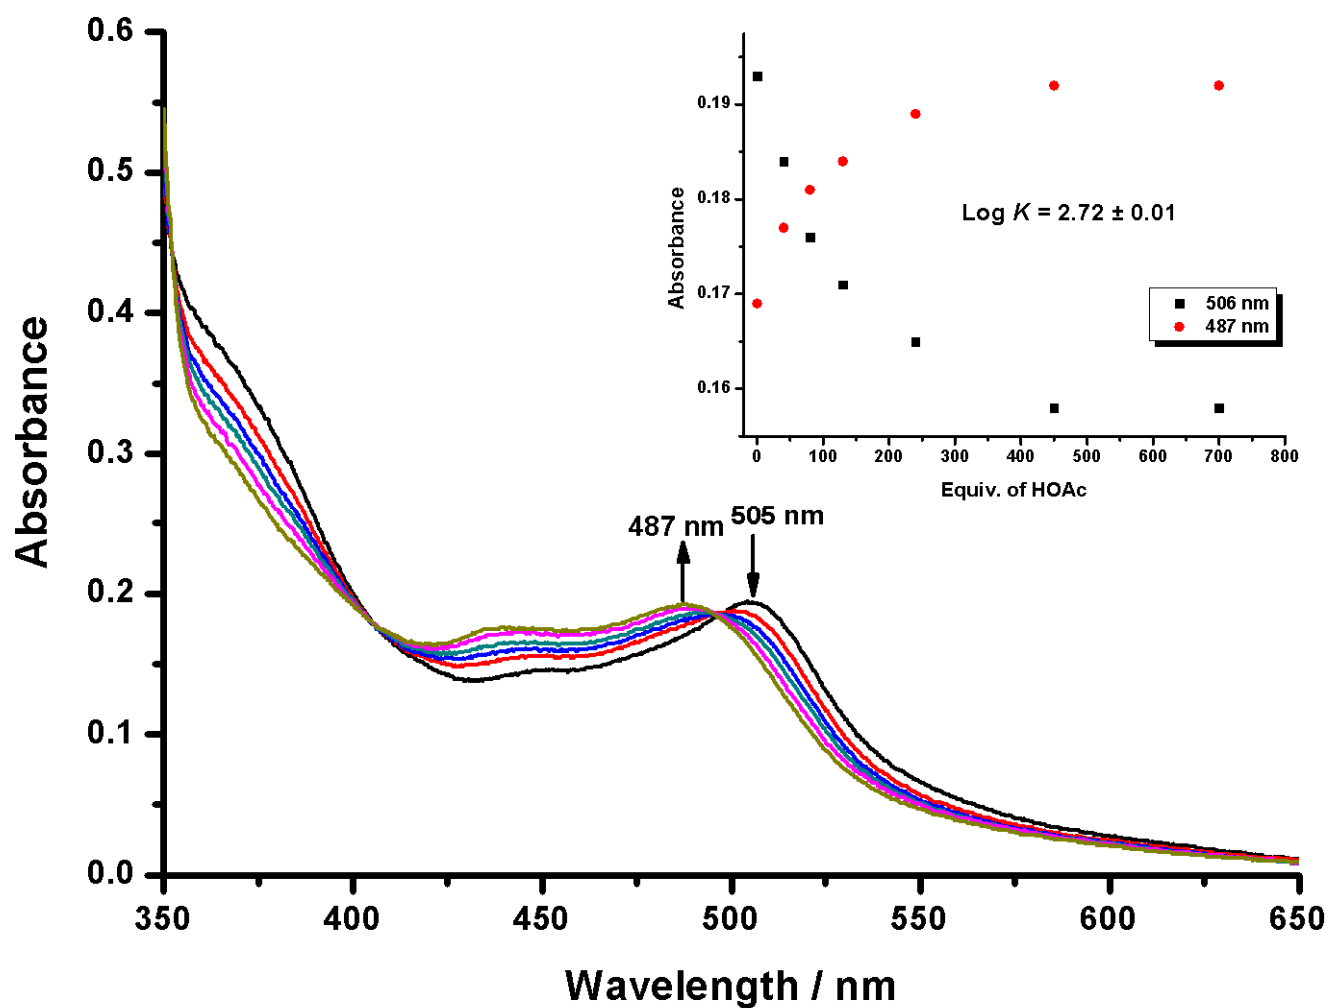

**Fig. S19** UV-vis titration of mono-deprotonated **3** ( $2.0 \times 10^{-5}$  mol·dm<sup>-3</sup>) in acetonitrile upon addition of HOAc. Inset: Absorbance at 487 and 505 nm vs. equiv of HOAc.

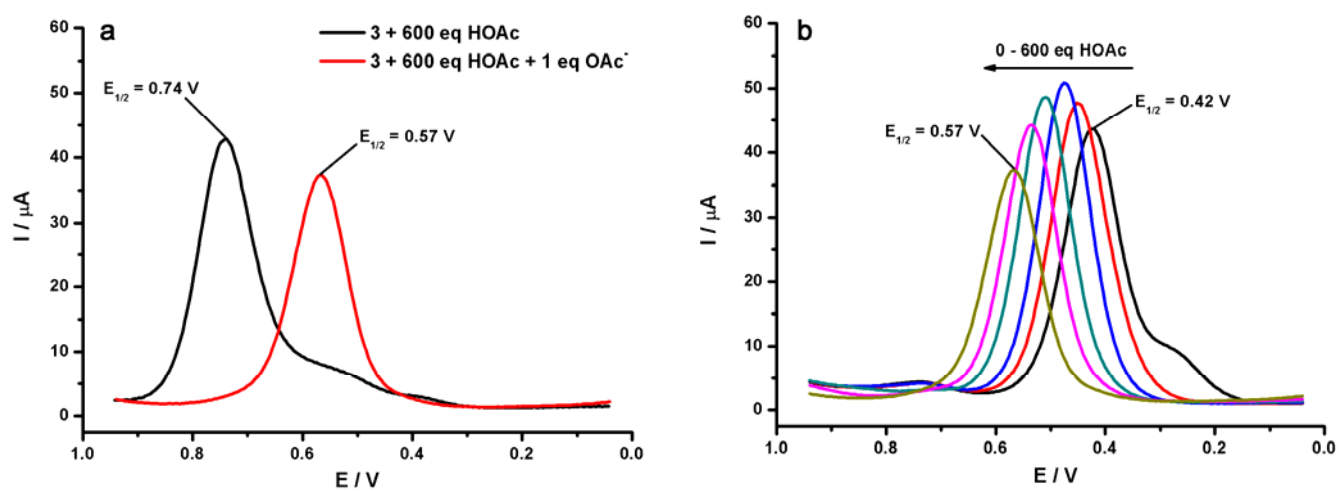

**Fig. S20** (a) SWV curves of **3** (0.001 mol·dm<sup>-3</sup>) and 600 equiv. of HOAc in acetonitrile in the absence and presence of 1 equiv. of OAc<sup>-</sup>. (b) Evolution of SWV curves of **3** (0.001 mol·dm<sup>-3</sup>) and 1 equiv. of OAc<sup>-</sup> in acetonitrile in the presence of increasing amount of HOAc from 0 to 600 equiv.

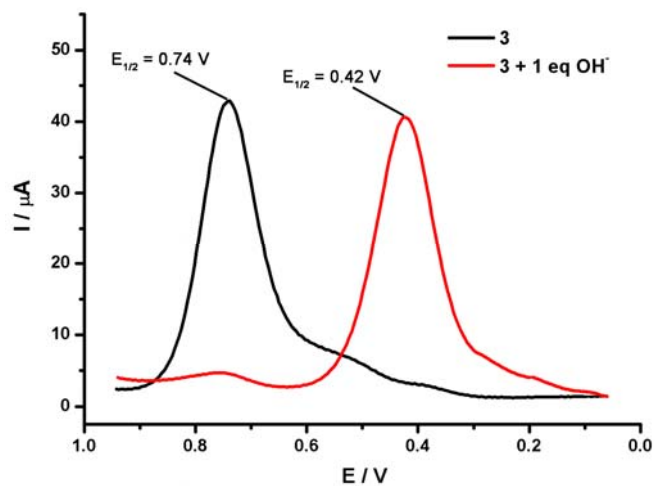

**Fig. S21** SWV measurements of **3** in acetonitrile (0.001 mol·dm<sup>-3</sup>) in the absence and presence of 1 equiv of OH<sup>-</sup> (vs. Ag/AgNO<sub>3</sub>).

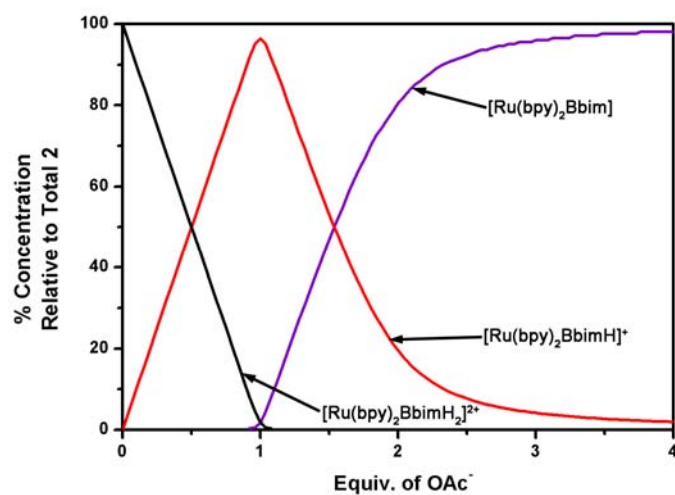

**Fig. S22** Distribution diagram for **2** in acetonitrile upon addition of OAc<sup>-</sup>.

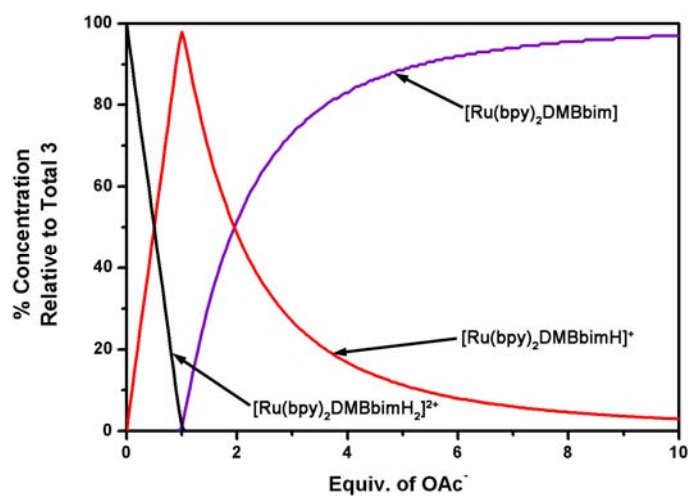

**Fig. S23** Distribution diagram for **3** in acetonitrile upon addition of OAc<sup>-</sup>.
